# Supplementary material for: Resilience in the Storm: Impacts of Changed Daily Lifestyles on Mental Health in Persons with Chronic Illnesses under the COVID-19 Pandemic
Source: MDPI journal article supplement (doi:10.3390/ijerph18115875), 2021-05-30
Supplement: s1 [file s1]

**Table S1.** Results of ANOVAs with post-hoc analysis.

| Change of Daily Lifestyles                    |             | Mean | SD   | P-values of omnibus effects | P-values of Post-hoc tests with Tukey's adjustment |       |       |
|-----------------------------------------------|-------------|------|------|-----------------------------|----------------------------------------------------|-------|-------|
|                                               |             |      |      |                             | 2                                                  | 3     | 4     |
| <b>Age</b>                                    |             |      |      |                             |                                                    |       |       |
|                                               | WHO5        |      |      | 0.083                       |                                                    |       |       |
| 1                                             | <55         | 43.5 | 20.8 |                             | 0.163                                              | 0.086 |       |
| 2                                             | 55-64       | 48.7 | 23.4 |                             |                                                    | 0.953 |       |
| 3                                             | 65 or above | 49.5 | 22.4 |                             |                                                    |       |       |
| <b>DASS-21 Depression</b>                     |             |      |      |                             |                                                    |       |       |
|                                               |             |      |      | 0.039                       |                                                    |       |       |
| 1                                             | <55         | 7.8  | 9.2  |                             | 0.155                                              | 0.032 |       |
| 2                                             | 55-64       | 8.7  | 8.4  |                             |                                                    | 0.765 |       |
| 3                                             | 65 or above | 6.0  | 8.0  |                             |                                                    |       |       |
| <b>DASS-21 Anxiety</b>                        |             |      |      |                             |                                                    |       |       |
|                                               |             |      |      | 0.019                       |                                                    |       |       |
| 1                                             | <55         | 8.8  | 9.3  |                             | 0.483                                              | 0.016 |       |
| 2                                             | 55-64       | 8.9  | 7.2  |                             |                                                    | 0.193 |       |
| 3                                             | 65 or above | 6.8  | 7.1  |                             |                                                    |       |       |
| <b>DASS-21 Stress</b>                         |             |      |      |                             |                                                    |       |       |
|                                               |             |      |      | 0.008                       |                                                    |       |       |
| 1                                             | <55         | 12.0 | 9.9  |                             | 0.115                                              | 0.005 |       |
| 2                                             | 55-64       | 12.6 | 8.9  |                             |                                                    | 0.450 |       |
| 3                                             | 65 or above | 8.7  | 8.9  |                             |                                                    |       |       |
| <b>CD-RISC</b>                                |             |      |      |                             |                                                    |       |       |
|                                               |             |      |      | <0.001                      |                                                    |       |       |
| 1                                             | <55         | 27.7 | 8.3  |                             | 0.029                                              | 0.000 |       |
| 2                                             | 55-64       | 25.6 | 7.8  |                             |                                                    | 0.296 |       |
| 3                                             | 65 or above | 28.4 | 7.5  |                             |                                                    |       |       |
| <b>Sex</b>                                    |             |      |      |                             |                                                    |       |       |
| <b>WHO5</b>                                   |             |      |      |                             |                                                    |       |       |
|                                               |             |      |      | 0.168                       |                                                    |       |       |
| 1                                             | Female      | 46.4 |      |                             |                                                    |       |       |
| 2                                             | Male        | 49.6 |      |                             |                                                    |       |       |
| <b>DASS-21 Depression</b>                     |             |      |      |                             |                                                    |       |       |
|                                               |             |      |      | 0.232                       | 0.770                                              |       |       |
| 1                                             | Female      | 7.7  |      |                             |                                                    |       |       |
| 2                                             | Male        | 7.5  |      |                             |                                                    |       |       |
| <b>DASS-21 Anxiety</b>                        |             |      |      |                             |                                                    |       |       |
|                                               |             |      |      | 0.005                       |                                                    |       |       |
| 1                                             | Female      | 8.8  |      |                             |                                                    |       |       |
| 2                                             | Male        | 6.8  |      |                             |                                                    |       |       |
| <b>DASS-21 Stress</b>                         |             |      |      |                             |                                                    |       |       |
|                                               |             |      |      | 0.927                       |                                                    |       |       |
| 1                                             | Female      | 11.0 |      |                             |                                                    |       |       |
| 2                                             | Male        | 10.9 |      |                             |                                                    |       |       |
| <b>CD-RISC</b>                                |             |      |      |                             |                                                    |       |       |
|                                               |             |      |      | 0.642                       |                                                    |       |       |
| 1                                             | Female      | 26.8 | 7.7  |                             |                                                    |       |       |
| 2                                             | Male        | 27.2 | 8.1  |                             |                                                    |       |       |
| <b>Disabling effect of chronic conditions</b> |             |      |      |                             |                                                    |       |       |
| <b>WHO5</b>                                   |             |      |      |                             |                                                    |       |       |
|                                               |             |      |      | 0.101                       |                                                    |       |       |
| 1                                             | 1 type      | 48.7 |      |                             | 0.995                                              | 0.415 | 0.702 |
| 2                                             | 2 types     | 48.0 |      |                             |                                                    | 0.593 | 0.779 |
| 3                                             | 3 types     | 43.0 |      |                             |                                                    |       | 0.999 |
| 4                                             | 4 types     | 42.0 |      |                             |                                                    |       |       |
| <b>DASS-21 Depression</b>                     |             |      |      |                             |                                                    |       |       |
|                                               |             |      |      | 0.421                       | 0.004                                              |       |       |
| 1                                             | 1 type      | 6.6  |      |                             | 0.312                                              | 0.001 | 1.000 |

|                           |          |      |       |       |       |       |
|---------------------------|----------|------|-------|-------|-------|-------|
| 2                         | 2 types  | 8.3  |       |       | 0.074 | 0.871 |
| 3                         | 3 types  | 11.9 |       |       |       | 0.147 |
| 4                         | 4 types  | 6.5  |       |       |       |       |
| <b>DASS-21 Anxiety</b>    |          |      | 0.000 |       |       |       |
| 1                         | 1 type   | 7.2  |       | 0.532 | 0.008 | 0.174 |
| 2                         | 2 types  | 8.3  |       |       | 0.170 | 0.483 |
| 3                         | 3 types  | 11.0 |       |       |       | 0.999 |
| 4                         | 4 types  | 11.3 |       |       |       |       |
| <b>DASS-21 Stress</b>     |          |      | 0.003 |       |       |       |
| 1                         | 1 type   | 9.8  |       | 0.134 | 0.081 | 0.514 |
| 2                         | 2 types  | 12.1 |       |       | 0.863 | 0.970 |
| 3                         | 3 types  | 13.4 |       |       |       | 1.000 |
| 4                         | 4 types  | 13.3 |       |       |       |       |
| <b>CD-RISC</b>            |          |      | 0.390 |       |       |       |
| 1                         | 1 type   | 27.3 | 7.9   | 0.891 | 0.446 | 0.957 |
| 2                         | 2 types  | 26.7 | 7.9   |       | 0.806 | 0.861 |
| 3                         | 3 types  | 25.4 | 8.0   |       |       | 0.594 |
| 4                         | 4 types  | 28.4 | 5.2   |       |       |       |
| <b>Exercise</b>           |          |      |       |       |       |       |
| <b>WHO5</b>               |          |      | 0.037 |       |       |       |
| 1                         | No       | 43.6 | 22.1  | 0.997 | 0.484 | 0.596 |
| 2                         | Reduce   | 44.6 | 21.3  |       | 0.048 | 0.277 |
| 3                         | Same     | 51.0 | 22.9  |       |       | 1.000 |
| 4                         | Increase | 50.8 | 24.3  |       |       |       |
| <b>DASS-21 Depression</b> |          |      | 0.038 |       |       |       |
| 1                         | No       | 7.8  | 9.2   | 0.970 | 0.793 | 0.999 |
| 2                         | Reduce   | 8.7  | 8.4   |       | 0.022 | 0.973 |
| 3                         | Same     | 6.0  | 8.0   |       |       | 0.385 |
| 4                         | Increase | 8.1  | 9.4   |       |       |       |
| <b>DASS-21 Anxiety</b>    |          |      | 0.056 |       |       |       |
| 1                         | No       | 8.8  | 9.3   | 1.000 | 0.616 | 0.950 |
| 2                         | Reduce   | 8.9  | 7.2   |       | 0.036 | 0.751 |
| 3                         | Same     | 6.8  | 7.1   |       |       | 0.792 |
| 4                         | Increase | 7.8  | 7.2   |       |       |       |
| <b>DASS-21 Stress</b>     |          |      | 0.002 |       |       |       |
| 1                         | No       | 12.0 | 9.9   | 0.992 | 0.403 | 0.914 |
| 2                         | Reduce   | 12.6 | 8.9   |       | 0.001 | 0.423 |
| 3                         | Same     | 8.7  | 8.9   |       |       | 0.601 |
| 4                         | Increase | 10.5 | 8.9   |       |       |       |
| <b>CD-RISC</b>            |          |      | 0.009 |       |       |       |
| 1                         | No       | 27.7 | 8.3   | 0.649 | 0.981 | 0.999 |
| 2                         | Reduce   | 25.6 | 7.8   |       | 0.008 | 0.184 |
| 3                         | Same     | 28.4 | 7.5   |       |       | 0.990 |
| 4                         | Increase | 28.0 | 8.2   |       |       |       |
| <b>Outdoor</b>            |          |      |       |       |       |       |
| <b>WHO5</b>               |          |      | 0.000 |       |       |       |
| 1                         | No       | 59.5 | 29.2  | 0.224 | 0.865 | 0.999 |
| 2                         | Reduce   | 44.4 | 21.6  |       | 0.003 | 0.021 |
| 3                         | Same     | 53.2 | 22.6  |       |       | 0.580 |
| 4                         | Increase | 60.8 | 19.9  |       |       |       |
| <b>DASS-21 Depression</b> |          |      | 0.232 |       |       |       |
| 1                         | No       | 6.6  | 6.9   | 0.946 | 1.000 | 1.000 |

|                                    |          |      |      |       |       |       |       |
|------------------------------------|----------|------|------|-------|-------|-------|-------|
| 2                                  | Reduce   | 8.2  | 8.3  |       |       | 0.191 | 0.909 |
| 3                                  | Same     | 6.3  | 8.6  |       |       |       | 0.997 |
| 4                                  | Increase | 6.8  | 10.5 |       |       |       |       |
| <b>DASS-21 Anxiety</b>             |          |      |      | 0.212 |       |       |       |
| 1                                  | No       | 10.9 | 10.8 |       | 0.764 | 0.431 | 0.807 |
| 2                                  | Reduce   | 8.4  | 7.3  |       |       | 0.276 | 0.999 |
| 3                                  | Same     | 6.9  | 7.4  |       |       |       | 0.925 |
| 4                                  | Increase | 8.1  | 5.7  |       |       |       |       |
| <b>DASS-21 Stress</b>              |          |      |      | 0.020 |       |       |       |
| 1                                  | No       | 9.6  | 10.5 |       | 0.897 | 0.996 | 0.987 |
| 2                                  | Reduce   | 11.9 | 9.0  |       |       | 0.021 | 0.413 |
| 3                                  | Same     | 8.9  | 9.0  |       |       |       | 0.995 |
| 4                                  | Increase | 8.3  | 7.7  |       |       |       |       |
| <b>CD-RISC</b>                     |          |      |      | 0.000 |       |       |       |
| 1                                  | No       | 30.8 | 9.0  |       | 0.649 | 0.981 | 0.999 |
| 2                                  | Reduce   | 25.8 | 7.6  |       |       | 0.008 | 0.184 |
| 3                                  | Same     | 29.1 | 7.9  |       |       |       | 0.990 |
| 4                                  | Increase | 31.1 | 6.9  |       |       |       |       |
| <b>Utilization of NGO services</b> |          |      |      |       |       |       |       |
| <b>WHO5</b>                        |          |      |      | 0.065 |       |       |       |
| 1                                  | No       | 48.6 | 23.4 |       | 0.739 | 0.550 | 0.900 |
| 2                                  | Reduce   | 45.7 | 22.0 |       |       | 0.072 | 0.532 |
| 3                                  | Same     | 53.9 | 22.9 |       |       |       | 0.993 |
| 4                                  | Increase | 52.4 | 21.2 |       |       |       |       |
| <b>DASS-21 Depression</b>          |          |      |      | 0.421 |       |       |       |
| 1                                  | No       | 8.5  | 9.8  |       | 0.936 | 0.474 | 0.691 |
| 2                                  | Reduce   | 7.8  | 8.2  |       |       | 0.628 | 0.830 |
| 3                                  | Same     | 6.3  | 7.8  |       |       |       | 1.000 |
| 4                                  | Increase | 6.2  | 8.5  |       |       |       |       |
| <b>DASS-21 Anxiety</b>             |          |      |      | 0.007 |       |       |       |
| 1                                  | No       | 8.8  | 7.8  |       | 0.986 | 0.225 | 0.024 |
| 2                                  | Reduce   | 8.5  | 7.3  |       |       | 0.205 | 0.021 |
| 3                                  | Same     | 6.3  | 7.3  |       |       |       | 0.520 |
| 4                                  | Increase | 3.8  | 4.3  |       |       |       |       |
| <b>DASS-21 Stress</b>              |          |      |      | 0.386 |       |       |       |
| 1                                  | No       | 10.6 | 9.9  |       | 0.899 | 0.914 | 0.891 |
| 2                                  | Reduce   | 11.5 | 8.8  |       |       | 0.517 | 0.638 |
| 3                                  | Same     | 9.6  | 9.0  |       |       |       | 0.996 |
| 4                                  | Increase | 9.1  | 9.5  |       |       |       |       |
| <b>CD-RISC</b>                     |          |      |      | 0.013 |       |       |       |
| 1                                  | No       | 27.0 | 8.0  |       | 0.908 | 0.891 | 0.058 |
| 2                                  | Reduce   | 26.3 | 7.8  |       |       | 0.486 | 0.010 |
| 3                                  | Same     | 28.0 | 8.1  |       |       |       | 0.229 |
| 4                                  | Increase | 31.8 | 6.5  |       |       |       |       |
| <b>Utilization of SHO services</b> |          |      |      |       |       |       |       |
| <b>WHO5</b>                        |          |      |      | 0.003 |       |       |       |
| 1                                  | No       | 46.5 | 22.3 |       | 0.977 | 0.032 | 0.122 |
| 2                                  | Reduce   | 45.5 | 22.1 |       |       | 0.011 | 0.075 |
| 3                                  | Same     | 57.1 | 22.4 |       |       |       | 0.991 |
| 4                                  | Increase | 59.1 | 19.8 |       |       |       |       |
| <b>DASS-21 Depression</b>          |          |      |      | 0.414 |       |       |       |
| 1                                  | No       | 7.9  | 9.1  |       | 1.000 | 0.613 | 0.704 |

|                              |          |      |      |       |       |       |       |
|------------------------------|----------|------|------|-------|-------|-------|-------|
| 2                            | Reduce   | 8.0  | 8.2  |       |       | 0.559 | 0.675 |
| 3                            | Same     | 6.1  | 8.0  |       |       |       | 0.996 |
| 4                            | Increase | 5.6  | 7.1  |       |       |       |       |
| <b>DASS-21 Anxiety</b>       |          |      |      | 0.214 |       |       |       |
| 1                            | No       | 8.3  | 7.5  |       | 1.000 | 0.203 | 1.000 |
| 2                            | Reduce   | 8.3  | 7.2  |       |       | 0.179 | 1.000 |
| 3                            | Same     | 5.8  | 6.8  |       |       |       | 0.579 |
| 4                            | Increase | 8.4  | 8.3  |       |       |       |       |
| <b>DASS-21 Stress</b>        |          |      |      | 0.085 |       |       |       |
| 1                            | No       | 11.4 | 9.7  |       | 1.000 | 0.090 | 0.885 |
| 2                            | Reduce   | 11.4 | 8.7  |       |       | 0.074 | 0.876 |
| 3                            | Same     | 7.7  | 8.1  |       |       |       | 0.867 |
| 4                            | Increase | 9.7  | 9.2  |       |       |       |       |
| <b>CD-RISC</b>               |          |      |      | 0.035 |       |       |       |
| 1                            | No       | 26.8 | 8.5  |       | 0.956 | 0.132 | 0.476 |
| 2                            | Reduce   | 26.3 | 7.5  |       |       | 0.052 | 0.337 |
| 3                            | Same     | 29.7 | 6.9  |       |       |       | 1.000 |
| 4                            | Increase | 29.6 | 6.4  |       |       |       |       |
| <b>Contact with others</b>   |          |      |      |       |       |       |       |
| <b>WHO5</b>                  |          |      |      | 0.000 |       |       |       |
| 1                            | No       | 37.1 | 23.0 |       | 0.758 | 0.065 | 0.666 |
| 2                            | Reduce   | 43.8 | 22.4 |       |       | 0.000 | 0.965 |
| 3                            | Same     | 54.1 | 21.2 |       |       |       | 0.124 |
| 4                            | Increase | 45.6 | 22.3 |       |       |       |       |
| <b>DASS-21 Depression</b>    |          |      |      | 0.002 |       |       |       |
| 1                            | No       | 12.7 | 10.4 |       | 0.447 | 0.049 | 0.108 |
| 2                            | Reduce   | 8.9  | 8.6  |       |       | 0.007 | 0.275 |
| 3                            | Same     | 6.0  | 8.2  |       |       |       | 0.996 |
| 4                            | Increase | 6.3  | 6.7  |       |       |       |       |
| <b>DASS-21 Anxiety</b>       |          |      |      | 0.037 |       |       |       |
| 1                            | No       | 10.5 | 9.3  |       | 0.886 | 0.354 | 0.750 |
| 2                            | Reduce   | 8.9  | 7.5  |       |       | 0.037 | 0.911 |
| 3                            | Same     | 6.8  | 6.9  |       |       |       | 0.753 |
| 4                            | Increase | 8.0  | 7.3  |       |       |       |       |
| <b>DASS-21 Stress</b>        |          |      |      | 0.000 |       |       |       |
| 1                            | No       | 15.6 | 8.9  |       | 0.729 | 0.051 | 0.234 |
| 2                            | Reduce   | 12.8 | 9.3  |       |       | 0.000 | 0.239 |
| 3                            | Same     | 8.5  | 8.6  |       |       |       | 0.797 |
| 4                            | Increase | 9.9  | 7.2  |       |       |       |       |
| <b>CD-RISC</b>               |          |      |      | 0.000 |       |       |       |
| 1                            | No       | 21.4 | 12.0 |       | 0.286 | 0.005 | 0.152 |
| 2                            | Reduce   | 25.6 | 7.4  |       |       | 0.000 | 0.768 |
| 3                            | Same     | 29.3 | 7.7  |       |       |       | 0.258 |
| 4                            | Increase | 26.8 | 7.1  |       |       |       |       |
| <b>Gathering with others</b> |          |      |      |       |       |       |       |
| <b>WHO5</b>                  |          |      |      | 0.026 |       |       |       |
| 1                            | No       | 33.8 | 19.3 |       | 0.286 | 0.039 | 0.291 |
| 2                            | Reduce   | 47.1 | 22.4 |       |       | 0.119 | 0.751 |
| 3                            | Same     | 56.1 | 20.1 |       |       |       | 0.992 |
| 4                            | Increase | 60.0 | 40.0 |       |       |       |       |
| <b>DASS-21 Depression</b>    |          |      |      | 0.138 |       |       |       |
| 1                            | No       | 13.2 | 10.3 |       | 0.205 | 0.168 | 0.215 |

|                        |          |      |      |       |       |       |       |
|------------------------|----------|------|------|-------|-------|-------|-------|
| 2                      | Reduce   | 7.6  | 8.4  |       |       | 0.925 | 0.700 |
| 3                      | Same     | 6.7  | 8.9  |       |       |       | 0.828 |
| 4                      | Increase | 2.3  | 4.0  |       |       |       |       |
| <b>DASS-21 Anxiety</b> |          |      |      | 0.559 |       |       |       |
| 1                      | No       | 11.3 | 8.9  |       | 0.551 | 0.481 | 0.921 |
| 2                      | Reduce   | 8.0  | 7.3  |       |       | 0.956 | 1.000 |
| 3                      | Same     | 7.3  | 7.3  |       |       |       | 0.998 |
| 4                      | Increase | 8.2  | 11.3 |       |       |       |       |
| <b>DASS-21 Stress</b>  |          |      |      | 0.101 |       |       |       |
| 1                      | No       | 15.9 | 9.8  |       | 0.369 | 0.238 | 0.110 |
| 2                      | Reduce   | 11.0 | 9.0  |       |       | 0.813 | 0.350 |
| 3                      | Same     | 9.5  | 9.1  |       |       |       | 0.550 |
| 4                      | Increase | 2.3  | 4.0  |       |       |       |       |
| <b>CD-RISC</b>         |          |      |      | 0.013 |       |       |       |
| 1                      | No       | 19.8 | 10.9 |       | 0.034 | 0.007 | 0.318 |
| 2                      | Reduce   | 26.9 | 7.6  |       |       | 0.329 | 0.981 |
| 3                      | Same     | 29.3 | 8.8  |       |       |       | 0.999 |
| 4                      | Increase | 28.7 | 7.6  |       |       |       |       |
